# Supplementary material for: Which crop biodiversity is used by the food industry throughout the world? A first evidence for legume species.
Source: Research Square preprint supplement (doi:10.21203/rs.3.rs-3452458/v1), 2023-12-20
Supplement: Supplementary file 1 [file c568ade4a4f351a6d5175a47.xlsx]

## Sheet: Sheet1
	Species	Frequency	InTop_Frequ	InRemList_Frequ	InDesc	InTop_%	InRemList_%	InDesc_%	Corpus_Frequency_%	NSL_Frequency_%
0	Glycine max	277656	93359	184297	11369	33.62	66.38	4.09	71.586	--
1	Pisum sativum	36144	16291	19853	10857	45.07	54.93	30.04	9.319	32.796
2	Phaseolus vulgaris	25358	14668	10690	14074	57.84	42.16	55.5	6.538	23.009
3	Cicer arietinum	16160	11560	4600	7947	71.53	28.47	49.18	4.166	14.663
4	Lens culinaris	9706	7083	2623	6826	72.98	27.02	70.33	2.502	8.807
5	Ceratonia siliqua	7212	89	7123	7	1.23	98.77	0.1	1.859	6.544
6	Phaseolus coccineus	4601	2398	2203	3786	52.12	47.88	82.29	1.186	4.175
7	Vigna radiata	3899	2005	1894	1299	51.42	48.58	33.32	1.005	3.538
8	Lupinus angustifolius	1715	669	1046	455	39.01	60.99	26.53	0.442	1.556
9	Vigna angularis	1284	698	586	381	54.36	45.64	29.67	0.331	1.165
10	Dolichos labLab	1162	447	715	0	38.47	61.53	0	0.3	1.054
11	Vicia faba	766	471	295	350	61.49	38.51	45.69	0.197	0.695
12	Vigna unguiculata	672	345	327	247	51.34	48.66	36.76	0.173	0.61
13	Vigna mungo	574	437	137	96	76.13	23.87	16.72	0.148	0.521
14	Cajanus cajan	202	136	66	142	67.33	32.67	70.3	0.052	0.183
15	Phaseolus acutifolius	196	118	78	1	60.2	39.8	0.51	0.051	0.178
16	Pachirhizus erosus	191	59	132	12	30.89	69.11	6.28	0.049	0.173
17	Vigna aconitifolia	140	84	56	19	60	40	13.57	0.036	0.127
18	Canavalia gladiata	122	31	91	23	25.41	74.59	18.85	0.031	0.111
19	Cyamopsis tetragonoloba	37	13	24	0	35.14	64.86	0	0.01	0.034
20	Lathyrus sativus	14	9	5	4	64.29	35.71	28.57	0.004	0.013
21	Canavalia ensiformis	13	6	7	4	46.15	53.85	30.77	0.003	0.012
22	Psophocarpus tetragonolobus	9	3	6	6	33.33	66.67	66.67	0.002	0.008
23	Mucuna uriens	8	0	8	1	0	100	12.5	0.002	0.007
24	Lotus japonicus	6	0	6	2	0	100	33.33	0.002	0.005
25	Clitoria ternatea	6	2	4	6	33.33	66.67	100	0.002	0.005
26	Phaseolus lunatus	3	3	0	4	100	0	133.33	0.001	0.003
27	Dipteryx odorata	3	0	3	3	0	100	100	0.001	0.003
28	Phaseolus maculatus	1	0	1	0	0	100	0	0	0.001
29	Tetragonolobus purpureus	1	0	1	0	0	100	0	0	0.001
30	Macrotyloma uniflorum	1	1	0	0	100	0	0	0	0.001
31	Moringa pterygosperma	1	0	1	0	0	100	0	0	0.001
32	Total	387863	150985	236878	57921	--	--	--	99.998	99.998
